# Supplementary material for: Preparation of electrolyzed oxidizing water with a platinum electrode prepared by magnetron sputtering technique
Source: Royal Society of Chemistry journal article supplement (doi:10.1039/c7ra08150b), 2017-01-01
Supplement: c7ra08150b1.pdf [file c7ra08150b1.pdf]

## Supporting information

### **Preparation of electrolyzed oxidizing water with platinum electrode prepared by magnetron sputtering**

Shaonan Wei, Liubin Shi, Zhandong Ren\*, Ailian Zhang, Ruoxi ming, Bo Chai and Yuchan Zhu\*

School of Chemical and Environmental Engineering, Wuhan Polytechnic University, Wuhan,  
430023, P. R. China.

E-mail:renzhandong@163.com; zhuyuchan@163.com

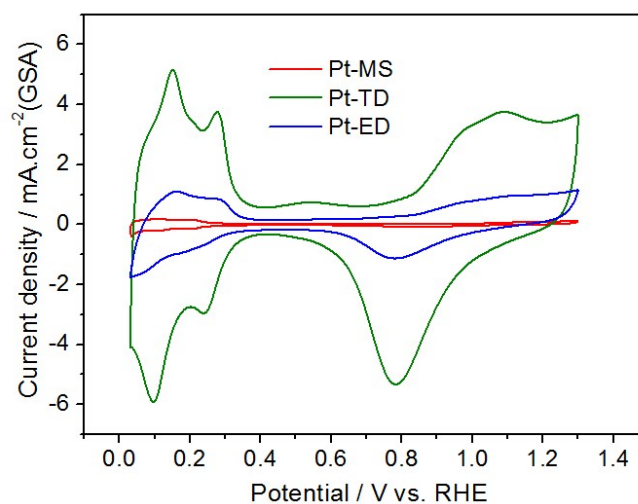

Fig. S1† Cyclic voltammograms of Pt-MS (red), Pt-TD (green) and Pt-ED (blue) electrodes in 0.5 mol·L<sup>-1</sup> H<sub>2</sub>SO<sub>4</sub> solution at a sweeping rate of 50 mV s<sup>-1</sup>.

Table S1† Sterilization effect of EO water prepared by Pt-MS, Pt-TD and Pt-ED electrodes

| Bacteria                            | Electrode | ACC of EO Water /mg L <sup>-1</sup> | Killing rate / % | Killing logarithm value / log CFU mL <sup>-1</sup> |
|-------------------------------------|-----------|-------------------------------------|------------------|----------------------------------------------------|
| <i>Escherichia coli</i>             | Pt-MS     | 81                                  | 99.99995         | 6.32                                               |
|                                     | Pt-TD     | 62                                  | 99.99995         | 6.30                                               |
|                                     | Pt-ED     | 49                                  | 99.99994         | 6.21                                               |
| <i>Bacillus subtilis var. niger</i> | Pt-MS     | 81                                  | 99.90781         | 3.04                                               |
|                                     | Pt-TD     | 62                                  | 99.86003         | 2.85                                               |
|                                     | Pt-ED     | 49                                  | 99.66756         | 2.48                                               |

Note: *Escherichia coli*: Initial bacteria concentration 9.18 log CFU mL<sup>-1</sup>, killing time 1 min;  
*Bacillus subtilis var. niger*: Initial bacteria concentration 6.87 log CFU mL<sup>-1</sup>, killing time 15 min.
